# Supplementary material for: Parental urinary biomarkers of preconception exposure to bisphenol A and phthalates in relation to birth outcomes
Source: PubMed Central journal article supplement (PMC4567813; doi:10.1186/s12940-015-0060-5), 2015-09-11
Supplement: 12940_2015_60_MOESM1_ESM.pdf [file 12940_2015_60_MOESM1_ESM.pdf]

Distribution of birth outcomes by infant sex, LIFE Study, 2005-2009.

| <b>Birth Outcome</b>                | <u>All</u>       |                 | <u>Girls</u>     |                 | <u>Boys</u>      |                 |
|-------------------------------------|------------------|-----------------|------------------|-----------------|------------------|-----------------|
|                                     | <b>Mean (SD)</b> | <b>Min-Max</b>  | <b>Mean (SD)</b> | <b>Min-Max</b>  | <b>Mean (SD)</b> | <b>Min-Max</b>  |
| Birth Weight (grams)†               | 3379.9 (472.3)   | 2012.8 - 4762.7 | 3313.7 (447.1)   | 2126.2 - 4252.4 | 3445.0 (488.7)   | 2012.8 - 4762.7 |
| Length (cm)                         | 50.5 (2.7)       | 43.2 - 55.9     | 50.3 (2.7)       | 43.2 - 55.9     | 50.8 (2.6)       | 43.2 - 55.9     |
| Head Circumference (cm)             | 34.8 (2.2)       | 27.9 - 48.3     | 34.5 (2.0)       | 30.5 - 40.6     | 34.9 (1.8)       | 27.9 - 38.1     |
| Ponderal Index (g/cm <sup>3</sup> ) | 2.6 (0.3)        | 1.8 - 3.6       | 2.6 (0.3)        | 1.8 - 3.6       | 2.6 (0.3)        | 2.0 - 3.6       |
| Gestational Age (days)              | 257.4 (12.4)     | 213.0 - 296.0   | 256.6 (15.6)     | 173.0 - 290.0   | 256.3 (15.5)     | 155.0 - 296.0   |

Abbreviations: N, sample size; SD, standard deviation; Min, minimum; Max, maximum.

<sup>a</sup>Number of participants with birth outcome data (N) for all: birth weight (233), length (230), head circumference (183), ponderal index (230), gestational age (200); (N) for girls (birth weight (116), length (115), head circumference (90), ponderal index (115), gestational age (98)); (N) for boys (birth weight (114), length (113), head circumference (90), ponderal index (113), gestational age (103));
